# Supplementary material for: Soybean Trade: Balancing Environmental and Socio-Economic Impacts of an Intercontinental Market
Source: PubMed Central journal article supplement (PMC4887031; doi:10.1371/journal.pone.0155222), 2016-05-31
Supplement: pone.0155222.s001.pdf [file pone.0155222.s001.pdf]

## S1 File. Monetary value per ecosystem service and land use

### 1. Details on the monetary data for food provisioning per land use:

| Land use                 | US\$/ha/y (\$-2008) |      | Comment                                                                       | Reference                                                   |
|--------------------------|---------------------|------|-------------------------------------------------------------------------------|-------------------------------------------------------------|
|                          | Min.                | Max. |                                                                               |                                                             |
| Soybean area (crop land) | 119                 | 242  | Net income soy production                                                     | Vera-Díaz and Schwartzman 2005                              |
|                          | 125                 | 438  | Soybean net profitability                                                     | Vera-Díaz et al 2008                                        |
|                          | 110                 |      | Gross annual return of the agricultural production in the Brazilian Amazonia  | Portela 2001                                                |
|                          | 420                 | 754  | Annual output cropland Amazon per hectare                                     | Andersen 1997                                               |
| Rain forest              | 208                 |      | Food provisioning rain forest                                                 | Costanza et al 2014                                         |
|                          | 0                   | 1746 | Food provisioning rain forest                                                 | De Groot et al 2012                                         |
|                          | 207                 |      | Food provisioning rain forest; mean value                                     | De Groot et al 2012                                         |
|                          | 78                  |      | Food provisioning tropical forest                                             | TEEB                                                        |
|                          | 600                 |      | Net revenues resulting from extraction of fruits and latexes, Peruvian Amazon | Peters et al. 1989; Pinedo-Vasquez et al. 1992; Torras 2000 |
|                          | 195                 |      | Value food Amazonian forest                                                   | Torras 2000                                                 |
| Grass/rangeland          | 1238                |      | Food provisioning grass/rangeland                                             | Costanza et al 2014                                         |
|                          | 23                  | 2447 | Food provisioning grassland                                                   | De Groot et al 2012                                         |
|                          | 1238                |      | Food provisioning grassland, mean                                             | De Groot et al 2012                                         |
| Grass EU                 | 1238                |      | Food provisioning grass/rangeland                                             | Costanza et al 2014                                         |
|                          | 23                  | 2447 | Food provisioning grassland                                                   | De Groot et al 2012                                         |
|                          | 7                   | 888  | EU: cost of maintaining permanent grassland                                   | EC 2011                                                     |
|                          | 321                 |      | EU: mean cost of maintaining permanent grassland                              | EC 2011                                                     |
| Grain maize              | 1614                |      | EU average gross margins for maize                                            | EU cereal farms report 2010                                 |
|                          | 1428                | 2000 | EU gross margins for maize                                                    | EU cereal farms report 2010                                 |
| Common wheat             | 571                 | 880  | EU 2007 gross margin for common wheat                                         | EU cereal farms report 2010                                 |
|                          | 777                 |      | EU 2007 average gross margin for common wheat                                 | EU cereal farms report 2010                                 |
| Barley                   | 286                 | 571  | EU 2007 gross margin for barley                                               | EU cereal farms report 2010                                 |
|                          | 611                 |      | EU 2007 average gross margin for barley                                       | EU cereal farms report 2010                                 |
| all cereals              | 714                 | 1143 | gross margin for cereals                                                      | EU cereal farms report 2010                                 |
| Other                    | 816                 |      | Average gross margin for cereals                                              | EU cereal farms report 2010                                 |

#### References:

- Andersen, L. E. 1997. A Cost-Benefit Analysis of Deforestation in the Brazilian Amazon. Rio de Janeiro.
- Costanza, R., R. de Groot, P. Sutton, S. van der Ploeg, S. J. Anderson, I. Kubiszewski, S. Farber, and R. K. Turner. 2014. Changes in the global value of ecosystem services. *Global Environmental Change* 26:152-158.
- de Groot, R., L. Brander, S. van der Ploeg, R. Costanza, F. Bernard, L. Braat, M. Christie, N. Crossman, A. Ghermandi, L. Hein, S. Hussain, P. Kumar, A. McVittie, R. Portela, L. C. Rodriguez, P. ten Brink, and P. van Beukering. 2012. Global estimates of the value of ecosystems and their services in monetary units. *Ecosystem Services* 1:50-61.
- EC. 2010. EU cereal farms report 2010, based on FADN data. European Commission Agriculture and Rural Development.
- EC. 2011. CAP towards 2020 Impact Assessment: Greening - results of partial analysis on impact on farm income using FADN. European Commission.
- Peters, C. M., A. H. Gentry, and R. O. Mendelsohn. 1989. Valuation of an Amazonian rainforest. *Nature* 339:655-656.
- Pinedo-Vasquez, M., D. Zarin, and P. Jipp. 1992. Economic returns from forest conversion in the Peruvian Amazon. *Ecological Economics* 6:163-173.
- Portela, R. and I. Rademacher. 2001. A dynamic model of patterns of deforestation and their effect on the ability of the Brazilian Amazonia to provide ecosystem services. *Ecological Modelling* 143:115-146.
- TEEB. 2010. *The Economics of Ecosystems and Biodiversity: The Ecological and Economic Foundations*.
- Torras, M. 2000. The total economic value of Amazonian deforestation, 1978–1993. *Ecological Economics* 33:283-297.
- Vera-Díaz, M. C. and S. Schwartzman. 2005. Carbon offsets and land use in the Brazilian Amazon. In P. Moutinho and S. Schwartzman, editors. *Tropical Deforestation and Climate Change*. Amazon Institute for Environmental Research. Belém – Pará and Washington DC - USA Environmental Defense.
- Vera-Díaz, M. d. C., R. K. Kaufmann, D. C. Nepstad, and P. Schlesinger. 2008. An interdisciplinary model of soybean yield in the Amazon Basin: The climatic, edaphic, and economic determinants. *Ecological Economics* 65:420-431.

2 Monetary value per land use, with indication of the value range (bar) and average values (diamonds) from literature: A: provisioning services, B: regulating services, C: supporting and cultural services.

A: Provisioning services (not food)

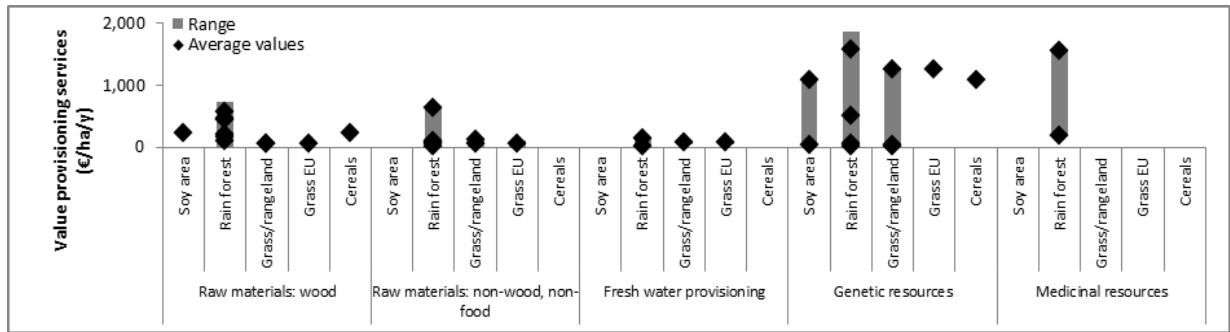

| ES                                | Soybean |       |      | Tropical forest |       |      | Tropical grass/rangeland |       |      | Grass EU |       |      | Crop EU |       |      |
|-----------------------------------|---------|-------|------|-----------------|-------|------|--------------------------|-------|------|----------|-------|------|---------|-------|------|
|                                   | Min     | Max   | Ref. | Min             | Max   | Ref. | Min                      | Max   | Ref. | Min      | Max   | Ref. | Min     | Max   | Ref. |
| Raw materials: wood               | 227     |       | a    | 87              |       | a    | 56                       |       | a    | 56       |       | a    | 227     |       | a    |
|                                   |         |       |      | 0               | 417   | b    | 60                       |       | f    |          |       |      |         |       |      |
|                                   |         |       |      | 457             |       | c    |                          |       |      |          |       |      |         |       |      |
|                                   |         |       |      | 736             |       | d    |                          |       |      |          |       |      |         |       |      |
|                                   |         |       |      | 461             | 677   | e    |                          |       |      |          |       |      |         |       |      |
|                                   |         |       |      | 150             | 185   | f    |                          |       |      |          |       |      |         |       |      |
| Raw materials: non-wood, non-food |         |       |      | 448             |       | g    |                          |       |      |          |       |      |         |       |      |
|                                   |         |       |      | 633             |       | h    | 2                        | 112   | b    | 2        | 112   | b    |         |       |      |
|                                   |         |       |      | 33              | 173   | c    | 108                      |       | j    |          |       |      |         |       |      |
|                                   |         |       |      | 75              |       | i    |                          |       |      |          |       |      |         |       |      |
|                                   |         |       |      | 55              | 110   | e    |                          |       |      |          |       |      |         |       |      |
| Fresh water provisioning          |         |       |      | 16              |       | f    |                          |       |      |          |       |      |         |       |      |
|                                   |         |       |      | 0               | 100   | k    |                          |       |      |          |       |      |         |       |      |
| Genetic resources                 |         |       |      | 8               | 48    | b    | 43                       | 88    | b    | 43       | 88    | b    |         |       |      |
|                                   |         |       |      | 148             |       | g    |                          |       |      |          |       |      |         |       |      |
|                                   | 1082    |       | a    | 1575            |       | a    | 1260                     |       | a    | 1260     |       | a    | 1082    |       | a    |
|                                   | 35      |       | l    | 14              |       | b    | 39                       |       | l    |          |       |      |         |       |      |
| Medicinal resources               |         |       |      | 502             |       | g    | 12                       |       | j    |          |       |      |         |       |      |
|                                   |         |       |      | 3               | 1867  | k    |                          |       |      |          |       |      |         |       |      |
|                                   |         |       |      | 50              |       | l    |                          |       |      |          |       |      |         |       |      |
|                                   |         |       |      | 1562            |       | b    |                          |       |      |          |       |      |         |       |      |
| SUM prov services                 |         |       |      | 188             |       | g    |                          |       |      |          |       |      |         |       |      |
|                                   | 262     | 1,309 |      | 199             | 4,946 |      | 113                      | 1,520 |      | 1,361    | 1,516 |      | 1,309   | 1,309 |      |

List of references at the end of Appendix 1.

B: Regulating services

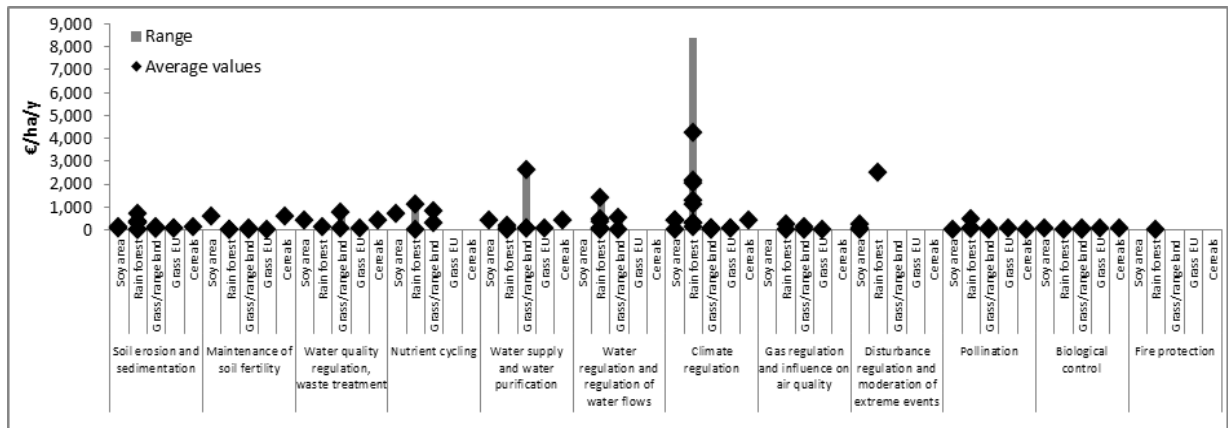

| ES                                                      | Soybean |       |      | Tropical forest |        |      | Tropical grass/rangeland |       |      | Grass EU |     |      | Crop EU |       |      |
|---------------------------------------------------------|---------|-------|------|-----------------|--------|------|--------------------------|-------|------|----------|-----|------|---------|-------|------|
|                                                         | Min     | Max   | Ref. | Min             | Max    | Ref. | Min                      | Max   | Ref. | Min      | Max | Ref. | Min     | Max   | Ref. |
| Soil erosion and sedimentation                          | 81      |       | l    | 350             |        | a    | 46                       |       | a    | 46       |     | a    | 111     |       | a    |
|                                                         | 111     |       | a    | 4               | 32     | b    | 39                       | 51    | b    | 39       | 51  | b    |         |       |      |
|                                                         |         |       |      | 721             |        | g    | 74                       |       | l    |          |     |      |         |       |      |
|                                                         |         |       |      | 355             |        | c    | 92                       |       | j    |          |     |      |         |       |      |
|                                                         |         |       |      | 299             |        | l    |                          |       |      |          |     |      |         |       |      |
| Maintenance of soil fertility                           | 552     |       | a    | 15              |        | a    | 2                        |       | a    | 2        |     | a    | 552     |       | a    |
|                                                         |         |       |      | 0               | 7      | b    | 32                       |       | j    |          |     |      |         |       |      |
| Water quality regulation, waste treatment               | 412     |       | a    | 125             |        | a    | 78                       |       | a    | 78       |     | a    | 412     |       | a    |
|                                                         |         |       |      |                 |        |      | 729                      |       | j    |          |     |      |         |       |      |
| Nutrient cycling                                        | 678     |       | l    | 3               |        | a    | 826                      |       | l    |          |     |      |         |       |      |
|                                                         |         |       |      | 1125            |        | l    | 267                      |       | j    |          |     |      |         |       |      |
| Water supply and water purification                     | 415     |       | a    | 28              |        | a    | 62                       |       | a    | 62       |     | a    | 415     |       | a    |
|                                                         |         |       |      | 0               | 10     | b    | 13                       | 143   | b    |          |     |      |         |       |      |
|                                                         |         |       |      | 184             |        | g    | 2588                     |       | j    |          |     |      |         |       |      |
| Water regulation and regulation of water flows          |         |       |      | 8               |        | a    | 3                        |       | a    |          |     |      |         |       |      |
|                                                         |         |       |      | 2               | 708    | b    | 547                      |       | j    |          |     |      |         |       |      |
|                                                         |         |       |      | 1412            |        | g    |                          |       |      |          |     |      |         |       |      |
|                                                         |         |       |      | 28              |        | c    |                          |       |      |          |     |      |         |       |      |
| Climate regulation                                      |         |       |      | 15              | 850    | k    |                          |       |      |          |     |      |         |       |      |
|                                                         |         |       |      | 80              |        | f    |                          |       |      |          |     |      |         |       |      |
|                                                         | 9       |       | l    | 2122            |        | a    | 42                       |       | a    | 42       |     | a    | 427     |       | a    |
|                                                         | 429     |       | f    | 4               | 8415   | b    | 0                        | 117   | b    | 0        | 117 | b    |         |       |      |
|                                                         | 427     |       | a    | 2040            |        | g    | 13                       |       | l    |          |     |      |         |       |      |
|                                                         |         |       |      | 88              | 500    | c    | 65                       |       | j    |          |     |      |         |       |      |
| Gas regulation and influence on air quality             |         |       |      | 360             | 2200   | k    |                          |       |      |          |     |      |         |       |      |
|                                                         |         |       |      | 100             | 144    | e    |                          |       |      |          |     |      |         |       |      |
| Disturbance regulation and moderation of extreme events |         |       |      | 272             |        | l    |                          |       |      |          |     |      |         |       |      |
|                                                         |         |       |      | 715             | 1430   | f    |                          |       |      |          |     |      |         |       |      |
|                                                         |         |       |      | 12              |        | a,b  | 9                        |       | a    | 9        |     | a    |         |       |      |
| Pollination                                             |         |       |      | 239             |        | g    | 97                       |       | j    |          |     |      |         |       |      |
|                                                         |         |       |      | 68              |        | a    | 2523                     |       | j    |          |     |      |         |       |      |
| Biological control                                      |         |       |      | 1               | 405    | B    |                          |       |      |          |     |      |         |       |      |
|                                                         |         |       |      | 6               |        | c    |                          |       |      |          |     |      |         |       |      |
|                                                         | 23      |       | a    | 31              |        | a    | 36                       |       | a    | 36       |     | a    | 23      |       | a    |
|                                                         |         |       |      | 6               | 55     | b    | 18                       |       | j    |          |     |      |         |       |      |
| Fire protection                                         |         |       |      | 458             |        | m    |                          |       |      |          |     |      |         |       |      |
|                                                         |         |       |      | 52              |        | e    |                          |       |      |          |     |      |         |       |      |
| SUM regulating services                                 | 2,204   | 2,654 |      | 176             | 13,118 |      | 2,965                    | 7,619 |      | 258      | 387 |      | 1,974   | 1,974 |      |

List of references at the end of Appendix 1.

### C: Habitat and supporting ES and cultural ES

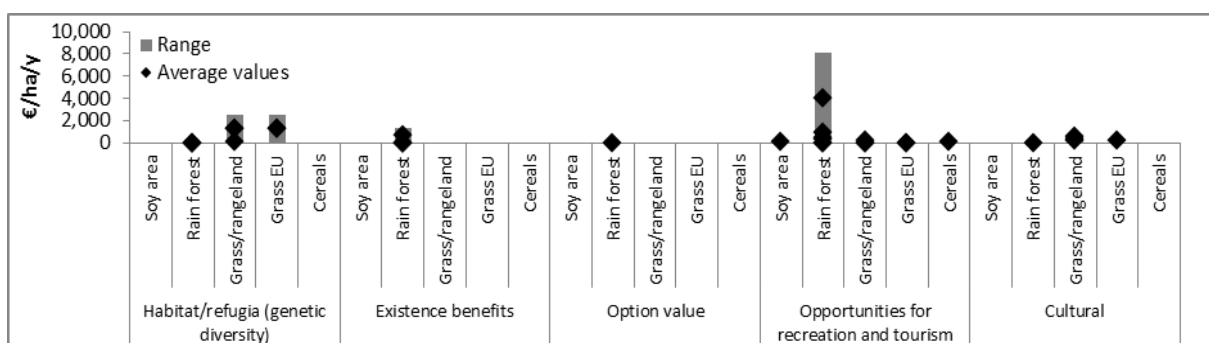

| ES                                    | Soybean |     |      | Tropical forest |       |      | Tropical grass/rangeland |       |      | Grass EU |       |      | Crop EU |     |      |
|---------------------------------------|---------|-----|------|-----------------|-------|------|--------------------------|-------|------|----------|-------|------|---------|-----|------|
|                                       | Min     | Max | Ref. | Min             | Max   | Ref. | Min                      | Max   | Ref. | Min      | Max   | Ref. | Min     | Max | Ref. |
| Habitat & refugia (genetic diversity) |         |     |      | 40              |       | a    | 1261                     |       | a    | 1261     |       | a    |         |     |      |
|                                       |         |     |      | 0               | 98    | b    | 0                        | 2521  | b    | 0        | 2521  | b    |         |     |      |
|                                       |         |     |      | 1               | 43    | f    | 153                      |       | j    |          |       |      |         |     |      |
| Existence benefits                    |         |     |      | 4               | 1330  | c    |                          |       |      |          |       |      |         |     |      |
|                                       |         |     |      | 2               | 23    | k    |                          |       |      |          |       |      |         |     |      |
|                                       |         |     |      | 16              | 41    | e    |                          |       |      |          |       |      |         |     |      |
|                                       |         |     |      | 10              |       | f    |                          |       |      |          |       |      |         |     |      |
| Option value                          |         |     |      | 13              | 48    | c    |                          |       |      |          |       |      |         |     |      |
| SUM supporting services               |         |     |      | 15              | 1,476 |      | 0                        | 2,521 |      | 0        | 2,521 |      |         |     |      |

| Cultural ES                              | Soybean |     |      | Tropical forest |       |      | Tropical grass/rangeland |     |      | Grass EU |     |      | Crop EU |     |      |
|------------------------------------------|---------|-----|------|-----------------|-------|------|--------------------------|-----|------|----------|-----|------|---------|-----|------|
|                                          | Min     | Max | Ref. | Min             | Max   | Ref. | Min                      | Max | Ref. | Min      | Max | Ref. | Min     | Max | Ref. |
| Opportunities for recreation and tourism | 85      |     | a    | 900             |       | a    | 27                       |     | a    | 27       |     | a    | 85      |     | a    |
|                                          |         |     |      | 0               | 8092  | b    | 2                        | 62  | b    | 2        | 62  | b    |         |     |      |
|                                          |         |     |      | 396             |       | g    | 227                      |     | j    |          |     |      |         |     |      |
|                                          |         |     |      | 7               | 82    | c    |                          |     |      |          |     |      |         |     |      |
|                                          |         |     |      | 2               | 1000  | k    |                          |     |      |          |     |      |         |     |      |
| Cultural                                 |         |     |      | 5               | 11    | e,f  |                          |     |      |          |     |      |         |     |      |
|                                          |         |     |      | 2               |       | a    | 173                      |     | a    | 173      |     | a    |         |     |      |
|                                          |         |     |      |                 |       |      | 1                        | 614 | b    |          |     |      |         |     |      |
| SUM cultural services                    | 85      | 85  |      | 2               | 8,094 |      | 3                        | 841 |      | 175      | 235 |      | 85      | 85  |      |

#### References:

- Costanza, R., R. de Groot, P. Sutton, S. van der Ploeg, S. J. Anderson, I. Kubiszewski, S. Farber, and R. K. Turner. 2014. Changes in the global value of ecosystem services. *Global Environmental Change* 26:152-158. (HCPI 2007-2008: 1,0383955) –ES review worldwide for Rain forests, grassland, cropland; update of Costanza et al. 1997
- de Groot, R., L. Brander, S. van der Ploeg, R. Costanza, F. Bernard, L. Braat, M. Christie, N. Crossman, A. Ghermandi, L. Hein, S. Hussain, P. Kumar, A. McVittie, R. Portela, L. C. Rodriguez, P. ten Brink, and P. van Beukering. 2012. Global estimates of the value of ecosystems and their services in monetary units. *Ecosystem Services* 1:50-61. (HCPI 2007-2008: 1,0383955) –ES review worldwide for Rain forests, grassland
- Torras, M. 2000. The total economic value of Amazonian deforestation, 1978–1993. *Ecological Economics* 33:283-297. (HCPI 1993-2008: 1,49) –Review Amazon, forest
- Pinedo-Vasquez, M., D. Zarin, and P. Jipp. 1992. Economic returns from forest conversion in the Peruvian Amazon. *Ecological Economics* 6:163-173. (HCPI 1992-2008: 1.53) –Peruvian Amazon
- Verweij, P., M. Schouten, P. van Beukering, J. Triana, K. van der Leeuw, and S. Hess. 2009. Keeping the Amazon forests standing: a matter of values. WWF. (HCPI 1991-2008: 1.58; HCPI 1994-2008: 1.44; HCPI 2005-2008: 1.10; HCPI 2006-2008: 1.07) –Amazon forest
- Andersen, L. E. 1997. A Cost-Benefit Analysis of Deforestation in the Brazilian Amazon. Rio de Janeiro.

- (*HCPI 1991-2008: 1.58; HCPI 1992-2008: 1.53; HCPI 1997-2008: 1.34*) –Amazon; Amazon Basin Columbia River Basin; dense forest and more open forest; savannah/cerrado; pasture or farmland. Value climate regulation is total, not annual benefit.
- g. TEEB. 2010. The Economics of Ecosystems and Biodiversity: The Ecological and Economic Foundations. (*HCPI 2007-2008: 1,0383955*) –review worldwide for Rain forests,
- h. Peters, C. M., A. H. Gentry, and R. O. Mendelsohn. 1989. Valuation of an Amazonian rainforest. *Nature* 339:655-656.  
(*HCPI 1993-2008: 1,49*) –Amazon rainforest
- i. Godoy, R., R. Lubowski, and A. Markandya. 1993. A method for the economic valuation of non-timber tropical forest products. *Economic Botany* 47:220-233.  
(*HCPI 1993-2008: 1.49*) –tropical forest
- j. Seidl, A. and A. Moraes. 2000. Global valuation of ecosystem services: application to the Pantanal da Nhecolandia, Brazil. *Ecological Economics* 33:1-6.  
(*HCPI 1994-2008: 1,443776*) –Pantanal Brazil
- k. Pearce, D. W. 2001. The economic value of forest ecosystems. *Ecosystem Health* 7:284-296.  
(*HCPI 2001-2008: 1.22*) –tropical forests (Atlantic Coast Brazil and Uplands of western Amazonia)
- l. Portela, R. and I. Rademacher. 2001. A dynamic model of patterns of deforestation and their effect on the ability of the Brazilian Amazonia to provide ecosystem services. *Ecological Modelling* 143:115-146.  
(*HCPI 2001-2008: 1.22*) –Brazilian Amazonia farm, forest, pasture (data reference Costanza et al 1997). Model results
- m. Ricketts, T. H., G. C. Daily, P. R. Ehrlich, and C. D. Michener. 2004. Economic value of tropical forest to coffee production. *Proceedings of the National Academy of Sciences of the United States of America* 101:12579-12582.  
(*HCPI 2002-2008: 1.2*) –case one Costa Rican farm, tropical forest
